# Supplementary material for: Dissolved CH 4 coupled to photosynthetic picoeukaryotes in oxic waters and to cumulative chlorophyll a in anoxic waters of reservoirs
Source: Copernicus journal article supplement (doi:10.5194/bg-17-3223-2020), 2020-06-26
Supplement: Supplementary file [file bg-17-3223-2020-supplement-title-page.pdf › bg-17-3223-2020-supplement-title-page.pdf]

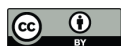

## *Supplement of*

# **Dissolved CH<sub>4</sub> coupled to photosynthetic picoeukaryotes in oxic waters and to cumulative chlorophyll *a* in anoxic waters of reservoirs**

**Elizabeth Leó et al.**

*Correspondence to:* Isabel Reche (ireche@ugr.es)

- bg-17-3223-2020-supplement-title-page.pdf
- Supplementary
  - Leon-Palmero et al suplementario\_2marked.docx
  - Leon-Palmero et al suplementario\_V2.docx
- \_\_MACOSX
  - Supplementary
    - \* .\_Leon-Palmero et al suplementario\_2marked.docx
    - \* .\_Leon-Palmero et al suplementario\_V2.docx

The copyright of individual parts of the supplement might differ from the CC BY 4.0 License.
